# Supplementary material
Source: PubMed Central journal article supplement (PMC4139722)
Supplement: ismej201429x1.pdf [file ismej201429x1.pdf]

**Supplementary Table S1. Bacterial List.**

| <i>Staphylococcus</i> spp. | Strain    | Description <sup>a</sup>                | Phage <sup>b</sup> |       |      |     |       |
|----------------------------|-----------|-----------------------------------------|--------------------|-------|------|-----|-------|
|                            |           |                                         | S6                 | S25-3 | S13' | 80  | φMR25 |
| <i>S. aureus</i>           | RN4220    | Without restriction modification system | ○                  | ○     | ○    | ○   | ○     |
| <i>S. aureus</i>           | SA1       | A                                       | ○                  | ○     | ○    | x   | ○     |
| <i>S. aureus</i>           | SA2       | A                                       | ○                  | ○     | ○    | x   | ○     |
| <i>S. aureus</i>           | SA3       | A                                       | ○                  | ○     | ○    | x   | LFW   |
| <i>S. aureus</i>           | SA4       | A                                       | ○                  | ○     | ○    | ○   | LFW   |
| <i>S. aureus</i>           | SA5       | A                                       | ○                  | LFW   | ○    | x   | ○     |
| <i>S. aureus</i>           | SA6       | A                                       | ○                  | LFW   | ○    | x   | ○     |
| <i>S. aureus</i>           | SA7       | A                                       | ○                  | LFW   | LFW  | x   | ○     |
| <i>S. aureus</i>           | SA8       | A                                       | ○                  | LFW   | LFW  | ○   | ○     |
| <i>S. aureus</i>           | SA9       | A                                       | ○                  | ○     | ○    | ○   | ○     |
| <i>S. aureus</i>           | SA10      | A                                       | ○                  | ○     | ○    | x   | ○     |
| <i>S. aureus</i>           | SA12      | A                                       | ○                  | LFW   | ○    | x   | ○     |
| <i>S. aureus</i>           | SA14      | A                                       | ○                  | ○     | ○    | x   | ○     |
| <i>S. aureus</i>           | SA15      | A                                       | ○                  | ○     | ○    | ○   | ○     |
| <i>S. aureus</i>           | SA16      | A                                       | ○                  | ○     | ○    | x   | ○     |
| <i>S. aureus</i>           | SA17      | A                                       | ○                  | ○     | ○    | ○   | ○     |
| <i>S. aureus</i>           | SA18      | A                                       | ○                  | ○     | ○    | x   | ○     |
| <i>S. aureus</i>           | SA19      | A                                       | x                  | ○     | x    | x   | ○     |
| <i>S. aureus</i>           | SA21      | A                                       | ○                  | ○     | ○    | ○   | ○     |
| <i>S. aureus</i>           | SA22      | A                                       | ○                  | ○     | ○    | ○   | ○     |
| <i>S. aureus</i>           | SA23      | A                                       | ○                  | ○     | ○    | x   | LFW   |
| <i>S. aureus</i>           | SA24      | A                                       | ○                  | LFW   | LFW  | x   | ○     |
| <i>S. aureus</i>           | SA25      | A                                       | ○                  | ○     | ○    | LFW | LFW   |
| <i>S. aureus</i>           | SA26      | A                                       | ○                  | LFW   | x    | x   | ○     |
| <i>S. aureus</i>           | SA27      | A                                       | ○                  | ○     | ○    | x   | ○     |
| <i>S. aureus</i>           | SA28      | A                                       | ○                  | ○     | ○    | x   | LFW   |
| <i>S. aureus</i>           | SA30      | A                                       | ○                  | ○     | ○    | x   | ○     |
| <i>S. aureus</i>           | SA31      | A                                       | ○                  | ○     | x    | x   | ○     |
| <i>S. aureus</i>           | SA32      | A                                       | ○                  | LFW   | LFW  | x   | ○     |
| <i>S. aureus</i>           | SA33      | A                                       | ○                  | ○     | ○    | x   | LFW   |
| <i>S. aureus</i>           | SA34      | A                                       | ○                  | LFW   | LFW  | x   | ○     |
| <i>S. aureus</i>           | SA36      | A                                       | ○                  | ○     | LFW  | x   | ○     |
| <i>S. aureus</i>           | SA37      | A                                       | ○                  | LFW   | ○    | ○   | ○     |
| <i>S. aureus</i>           | SA38      | A                                       | ○                  | ○     | ○    | x   | ○     |
| <i>S. aureus</i>           | SA39      | A                                       | ○                  | ○     | ○    | x   | ○     |
| <i>S. aureus</i>           | SA40      | A                                       | ○                  | LFW   | LFW  | ○   | ○     |
| <i>S. aureus</i>           | SA41      | A                                       | ○                  | ○     | ○    | ○   | ○     |
| <i>S. aureus</i>           | SA42      | A                                       | ○                  | ○     | ○    | ○   | ○     |
| <i>S. aureus</i>           | SA43      | A                                       | ○                  | ○     | ○    | x   | ○     |
| <i>S. aureus</i>           | SA44      | A                                       | ○                  | ○     | ○    | ○   | ○     |
| <i>S. aureus</i>           | SA45      | A                                       | ○                  | ○     | ○    | ○   | ○     |
| <i>S. aureus</i>           | SA46      | A                                       | ○                  | ○     | ○    | ○   | ○     |
| <i>S. aureus</i>           | SA47      | A                                       | ○                  | ○     | ○    | x   | ○     |
| <i>S. aureus</i>           | SA48      | A                                       | ○                  | ○     | ○    | x   | ○     |
| <i>S. aureus</i>           | IID 975   |                                         | ○                  | ○     | ○    | x   | x     |
| <i>S. aureus</i>           | IID 980   |                                         | ○                  | ○     | x    | ○   | LFW   |
| <i>S. aureus</i>           | IID 1677  |                                         | ○                  | ○     | ○    | x   | x     |
| <i>S. aureus</i>           | VTU 209   |                                         | ○                  | ○     | ○    | x   | x     |
| <i>S. aureus</i>           | COL       |                                         | ○                  | ○     | ○    | ○   | ○     |
| <i>S. aureus</i>           | NCTC10442 |                                         | ○                  | ○     | ○    | ○   | ○     |
| <i>S. aureus</i>           | 85/2082   |                                         | LFW                | LFW   | ○    | ○   | ○     |
| <i>S. aureus</i>           | N315      |                                         | ○                  | ○     | LFW  | x   | x     |
| <i>S. epidermidis</i>      | IID866    |                                         | x                  | ○     | x    | x   | x     |
| <i>S. epidermidis</i>      | ATCC12228 |                                         | ○                  | ○     | x    | x   | x     |
| <i>S. epidermidis</i>      | SE7       | B                                       | x                  | ○     | x    | x   | x     |
| <i>S. epidermidis</i>      | SE9       | B                                       | x                  | ○     | x    | x   | x     |
| <i>S. epidermidis</i>      | SE10      | B                                       | x                  | ○     | x    | x   | x     |
| <i>S. epidermidis</i>      | SE14      | B                                       | x                  | ○     | x    | x   | x     |
| <i>S. epidermidis</i>      | SE18      | B                                       | x                  | ○     | x    | x   | x     |

**Supplementary Table S1. Bacterial List.**

| <i>Staphylococcus</i> spp. | Strain | Description <sup>a</sup> | Phage <sup>b</sup> |       |      |    |       |
|----------------------------|--------|--------------------------|--------------------|-------|------|----|-------|
|                            |        |                          | S6                 | S25-3 | S13' | 80 | φMR25 |
| <i>S. epidermidis</i>      | SE20   | B                        | x                  | ○     | x    | x  | x     |
| <i>S. epidermidis</i>      | AF72   | B                        | x                  | ○     | x    | x  | x     |
| <i>S. epidermidis</i>      | AF706  | B                        | x                  | ○     | x    | x  | x     |
| <i>S. epidermidis</i>      | AF756  | B                        | x                  | ○     | x    | x  | x     |
| <i>S. epidermidis</i>      | AF760  | B                        | x                  | ○     | x    | x  | x     |
| <i>S. epidermidis</i>      | AF750  | B                        | x                  | ○     | x    | x  | x     |
| <i>S. epidermidis</i>      | AF720  | B                        | x                  | ○     | x    | x  | x     |
| <i>S. epidermidis</i>      | SE21   | B                        | x                  | ○     | x    | x  | x     |
| <i>S. epidermidis</i>      | SE23   | B                        | x                  | LFW   | x    | x  | x     |
| <i>S. epidermidis</i>      | SE24   | B                        | x                  | LFW   | x    | x  | x     |
| <i>S. epidermidis</i>      | SE26   | B                        | ○                  | LFW   | x    | x  | x     |
| <i>S. epidermidis</i>      | SE27   | B                        | x                  | ○     | x    | x  | x     |
| <i>S. epidermidis</i>      | SE28   | B                        | x                  | x     | x    | x  | x     |
| <i>S. epidermidis</i>      | SE29   | B                        | x                  | ○     | x    | x  | x     |
| <i>S. epidermidis</i>      | SE32   | B                        | x                  | x     | x    | x  | x     |
| <i>S. epidermidis</i>      | SE33   | B                        | x                  | LFW   | x    | x  | x     |
| <i>S. epidermidis</i>      | SE38   | B                        | x                  | ○     | x    | x  | x     |
| <i>S. epidermidis</i>      | SE39   | B                        | x                  | ○     | x    | x  | x     |
| <i>S. epidermidis</i>      | SE43   | B                        | x                  | LFW   | x    | x  | x     |
| <i>S. epidermidis</i>      | SE45   | B                        | x                  | LFW   | x    | x  | x     |
| <i>S. epidermidis</i>      | SE46   | B                        | x                  | ○     | x    | x  | x     |
| <i>S. epidermidis</i>      | SE47   | B                        | x                  | ○     | x    | x  | x     |
| <i>S. epidermidis</i>      | SE51   | B                        | x                  | x     | x    | x  | x     |
| <i>S. epidermidis</i>      | SE52   | B                        | x                  | ○     | x    | x  | x     |
| <i>S. epidermidis</i>      | SE56   | B                        | x                  | LFW   | x    | x  | x     |
| <i>S. epidermidis</i>      | SE57   | B                        | x                  | LFW   | x    | x  | x     |
| <i>S. felis</i>            | CO-6   | B                        | LFW                | ○     | x    | x  | x     |
| <i>S. felis</i>            | C3     | C                        | LFW                | LFW   | x    | x  | x     |
| <i>S. felis</i>            | C10    | C                        | ○                  | ○     | x    | x  | x     |
| <i>S. felis</i>            | C26    | C                        | ○                  | ○     | x    | x  | x     |
| <i>S. felis</i>            | C29    | C                        | ○                  | LFW   | x    | x  | x     |
| <i>S. felis</i>            | C53    | C                        | ○                  | LFW   | x    | x  | x     |
| <i>S. felis</i>            | C79    | C                        | ○                  | ○     | x    | x  | x     |
| <i>S. felis</i>            | C-8    | C                        | ○                  | ○     | x    | x  | x     |
| <i>S. felis</i>            | C4     | C                        | ○                  | LFW   | x    | x  | x     |
| <i>S. felis</i>            | C16    | C                        | ○                  | ○     | x    | x  | x     |
| <i>S. arlettae</i>         | D119   | D                        | ○                  | LFW   | x    | x  | x     |
| <i>S. arlettae</i>         | C128   | C                        | LFW                | ○     | x    | x  | x     |
| <i>S. arlettae</i>         | D91    | D                        | ○                  | LFW   | x    | x  | x     |
| <i>S. kloosii</i>          | D187   | D                        | LFW                | ○     | x    | x  | x     |
| <i>S. kloosii</i>          | C51    | C                        | LFW                | LFW   | x    | x  | x     |
| <i>S. kloosii</i>          | C21    | C                        | ○                  | ○     | x    | x  | x     |
| <i>S. kloosii</i>          | C55    | C                        | ○                  | ○     | x    | x  | x     |
| <i>S. kloosii</i>          | C57    | C                        | ○                  | LFW   | x    | x  | x     |
| <i>S. kloosii</i>          | D77    | D                        | LFW                | LFW   | x    | x  | x     |
| <i>S. kloosii</i>          | C18    | C                        | ○                  | ○     | x    | x  | x     |
| <i>S. pettenkoferi</i>     | C58    | C                        | ○                  | LFW   | x    | x  | x     |
| <i>S. pettenkoferi</i>     | C28    | C                        | ○                  | LFW   | x    | x  | x     |
| <i>S. pettenkoferi</i>     | C30    | C                        | ○                  | LFW   | x    | x  | x     |
| <i>S. pettenkoferi</i>     | C48    | C                        | ○                  | LFW   | x    | x  | x     |
| <i>S. pettenkoferi</i>     | C57    | C                        | ○                  | LFW   | x    | x  | x     |
| <i>S. schleiferi</i>       | CO-13  | D                        | ○                  | ○     | x    | x  | x     |
| <i>S. schleiferi</i>       | D91    | D                        | ○                  | ○     | x    | x  | x     |
| <i>S. schleiferi</i>       | D-88   | D                        | ○                  | LFW   | x    | x  | x     |
| <i>S. schleiferi</i>       | D-104  | D                        | ○                  | ○     | x    | x  | x     |
| <i>S. schleiferi</i>       | D84    | D                        | ○                  | LFW   | x    | x  | x     |
| <i>S. schleiferi</i>       | C50    | C                        | LFW                | ○     | x    | x  | x     |
| <i>S. schleiferi</i>       | D22    | D                        | x                  | ○     | x    | x  | x     |
| <i>S. schleiferi</i>       | D64    | D                        | x                  | ○     | x    | x  | x     |

**Supplementary Table S1. Bacterial List.**

| Staphylococcus spp.            | Strain  | Description <sup>a</sup> | Phage <sup>b</sup> |       |      |    |       |
|--------------------------------|---------|--------------------------|--------------------|-------|------|----|-------|
|                                |         |                          | S6                 | S25-3 | S13' | 80 | φMR25 |
| <i>S. schleiferi</i>           | D109    | D                        | ○                  | ○     | x    | x  | x     |
| <i>S. schleiferi</i>           | C7      | C                        | ○                  | ○     | x    | x  | x     |
| <i>S. sciuri subsp. sciuri</i> | GTC 291 |                          | ○                  | LFW   | x    | x  | x     |
| <i>S. sciuri</i>               | D108    | D                        | ○                  | ○     | x    | x  | x     |
| <i>S. sciuri</i>               | D186    | D                        | LFW                | ○     | x    | x  | x     |
| <i>S. sciuri</i>               | C62     | C                        | ○                  | ○     | x    | x  | x     |
| <i>S. sciuri</i>               | C67     | C                        | ○                  | ○     | x    | x  | x     |
| <i>S. sciuri</i>               | C71     | C                        | x                  | x     | x    | x  | x     |
| <i>S. sciuri</i>               | C124    | C                        | LFW                | LFW   | x    | x  | x     |
| <i>S. sciuri</i>               | D-63    | D                        | ○                  | LFW   | x    | x  | x     |
| <i>S. sciuri</i>               | D94     | D                        | LFW                | ○     | x    | x  | x     |
| <i>S. sciuri</i>               | C46     | C                        | LFW                | ○     | x    | x  | x     |
| <i>S. sciuri</i>               | D42     | D                        | LFW                | LFW   | x    | x  | x     |
| <i>S. pseudintermedius</i>     | D-1     | D                        | ○                  | LFW   | x    | x  | x     |
| <i>S. pseudintermedius</i>     | D-12    | D                        | ○                  | LFW   | x    | x  | x     |
| <i>S. pseudintermedius</i>     | D-21    | D                        | LFW                | LFW   | x    | x  | x     |
| <i>S. pseudintermedius</i>     | D-22    | D                        | LFW                | LFW   | x    | x  | x     |
| <i>S. pseudintermedius</i>     | D-28    | D                        | LFW                | ○     | x    | x  | x     |
| <i>S. pseudintermedius</i>     | D-30    | D                        | LFW                | LFW   | x    | x  | x     |
| <i>S. pseudintermedius</i>     | D-36    | D                        | ○                  | LFW   | x    | x  | x     |
| <i>S. pseudintermedius</i>     | D-76    | D                        | ○                  | LFW   | x    | x  | x     |
| <i>S. pseudintermedius</i>     | D-77    | D                        | x                  | LFW   | x    | x  | x     |
| <i>S. pseudintermedius</i>     | D-80    | D                        | ○                  | LFW   | x    | x  | x     |
| <i>S. pseudintermedius</i>     | C-14    | C                        | LFW                | LFW   | x    | x  | x     |
| <i>S. pseudintermedius</i>     | C-18    | C                        | LFW                | LFW   | x    | x  | x     |
| <i>S. pseudintermedius</i>     | D1      | D                        | ○                  | LFW   | x    | x  | x     |
| <i>S. pseudintermedius</i>     | D15     | D                        | ○                  | LFW   | x    | x  | x     |
| <i>S. pseudintermedius</i>     | D19     | D                        | ○                  | LFW   | x    | x  | x     |
| <i>S. pseudintermedius</i>     | D62     | D                        | ○                  | ○     | x    | x  | x     |
| <i>S. pseudintermedius</i>     | D72     | D                        | x                  | LFW   | x    | x  | x     |
| <i>S. pseudintermedius</i>     | D76     | D                        | ○                  | LFW   | x    | x  | x     |
| <i>S. pseudintermedius</i>     | D80     | D                        | x                  | x     | x    | x  | x     |
| <i>S. pseudintermedius</i>     | D82     | D                        | ○                  | LFW   | x    | x  | x     |
| <i>S. pseudintermedius</i>     | D100    | D                        | ○                  | LFW   | x    | x  | x     |
| <i>S. pseudintermedius</i>     | D103    | C                        | ○                  | ○     | x    | x  | x     |
| <i>S. pseudintermedius</i>     | C9      | C                        | ○                  | LFW   | x    | x  | x     |
| <i>S. pseudintermedius</i>     | C38     | D                        | LFW                | ○     | x    | x  | x     |
| <i>S. pseudintermedius</i>     | D5      | D                        | x                  | LFW   | x    | x  | x     |
| <i>S. pseudintermedius</i>     | D7      | D                        | x                  | x     | x    | x  | x     |
| <i>S. pseudintermedius</i>     | D9      | D                        | LFW                | ○     | x    | x  | x     |
| <i>S. pseudintermedius</i>     | D13     | D                        | LFW                | ○     | x    | x  | x     |
| <i>S. pseudintermedius</i>     | D15     | D                        | x                  | ○     | x    | x  | x     |
| <i>S. pseudintermedius</i>     | D56     | D                        | ○                  | ○     | x    | x  | x     |
| <i>S. pseudintermedius</i>     | D60     | D                        | LFW                | ○     | x    | x  | x     |
| <i>S. pseudintermedius</i>     | D61     | D                        | x                  | LFW   | x    | x  | x     |
| <i>S. pseudintermedius</i>     | D62     | D                        | ○                  | LFW   | x    | x  | x     |
| <i>S. pseudintermedius</i>     | D65     | D                        | LFW                | LFW   | x    | x  | x     |
| <i>S. pseudintermedius</i>     | D67     | D                        | ○                  | LFW   | x    | x  | x     |
| <i>S. pseudintermedius</i>     | D69     | D                        | LFW                | LFW   | x    | x  | x     |
| <i>S. pseudintermedius</i>     | D78     | D                        | ○                  | LFW   | x    | x  | x     |
| <i>S. pseudintermedius</i>     | D96     | D                        | LFW                | LFW   | x    | x  | x     |
| <i>S. pseudintermedius</i>     | C20     | C                        | ○                  | ○     | x    | x  | x     |
| <i>S. pseudintermedius</i>     | C28     | C                        | LFW                | ○     | x    | x  | x     |

<sup>a</sup>, *S. aureus* isolated from healthy individuals is described elsewhere (Takemura-Uchiyama *et al.*, 2013), which is designated as A.

<sup>a</sup>, *S. epidermidis* isolated from healthy individuals was kindly donated from Ms. Asako Muraoka, Kochi Junior College, Kochi, Japan, which is designated as B.

<sup>a</sup>, *Staphylococcus* spp. were isolated from cats and a dogs at Miyazaki University, Miyazaki, Japan, in the present study, which are designated as C and D, respectively.

<sup>b</sup>, Plaque formation, lysis-from-without, and the lack of both activities are represented as ○, LFW, and x, respectively.
