# Supplementary material
Source: PubMed Central journal article supplement (PMC4139722)
Supplement: ismej201429x2.pdf [file ismej201429x2.pdf]

**Supplementary Table S2. List of phages used in this study.**

| <i>S. aureus</i><br>phages | Viral taxonomy <sup>a</sup> |                       | Incubation<br>temperature<br>for phage<br>propagation <sup>b</sup> | Amplified host<br>bacteria | Culture<br>media <sup>c</sup> | Morphology<br>(mean ± SD; nm) <sup>d</sup> |                | Genome<br>size (kbp) | Description/<br>references             |
|----------------------------|-----------------------------|-----------------------|--------------------------------------------------------------------|----------------------------|-------------------------------|--------------------------------------------|----------------|----------------------|----------------------------------------|
|                            | Family                      | Genus                 |                                                                    |                            |                               | Head<br>diameter                           | Tail<br>length |                      |                                        |
| S6                         | <i>Myoviridae</i>           | Not<br>assigned       | 30 °C                                                              | <i>S. aureus</i> SA27      | TSB                           | 118.1 ± 8.5                                | 236.9 ± 6.6    | 270                  | This study                             |
| 80                         | <i>Siphoviridae</i>         | N.A.                  | 37 °C                                                              | <i>S. aureus</i> RN4220    | TSBM                          |                                            |                | 42                   | Chrstie <i>et al.</i> , 2010           |
| φMR25                      | <i>Siphoviridae</i>         | N.A.                  | 37 °C                                                              | <i>S. aureus</i> RN4220    | TSBM                          | 57 ± 2                                     | 198 ± 19       | 44                   | Hoshiba <i>et al.</i> , 2010           |
| S13'                       | <i>Podoviridae</i>          | AHJD-like<br>viruses  | 37 °C                                                              | <i>S. aureus</i> SA27      | TSB                           | 43.2 ± 2.3                                 | 32.1 ± 3.8     | 19                   | Takemura-Uchiyama <i>et al.</i> , 2013 |
| S25-3                      | <i>Myoviridae</i>           | Twort-like<br>viruses | 37 °C                                                              | <i>S. aureus</i> SA27      | TSB                           | 86.3 ± 3.9                                 | 242.5 ± 11.1   | 138                  | Takemura-Uchiyama <i>et al.</i> , 2013 |

<sup>a</sup>, N.A., not assigned.

<sup>b</sup>, Phage S6 had a stronger lytic activity at 30°C than at 37°C (see Figure S3).

<sup>c</sup>, TSB, tryptic soy broth; TSBM, TSB supplemented with 20 mM MgCl<sub>2</sub>.

<sup>d</sup>, SD, standard deviation.
