# Supplementary material
Source: PubMed Central journal article supplement (PMC4139722)
Supplement: ismej201429x3.pdf [file ismej201429x3.pdf]

**Supplementary Table S3. List of the PCR primers used for colony-direct PCR in this study.**

| <b>Primer set<sup>a</sup></b> | <b>Primer</b> | <b>Sequence</b>              | <b>Length of primer</b> | <b>Size of expected PCR product</b> | <b>Description</b>                                                       |
|-------------------------------|---------------|------------------------------|-------------------------|-------------------------------------|--------------------------------------------------------------------------|
| M13                           | RV            | CAGGAAACAGCTATGAC            | 17 nt                   | 124 bp                              | The primer set used to target the multiple cloning site of plasmid pCU1. |
|                               | M4            | GTTTTCCCAGTCACGAC            | 17 nt                   |                                     |                                                                          |
| MecA                          | mecA-F        | GTTCCACTTATTTTAATAGTTGTAGTTG | 28 nt                   | 506 bp                              | The primer set used to target the methicillin-resistant gene.            |
|                               | mecA-R        | GGAACGATGCCTATCTCATATG       | 22 nt                   |                                     |                                                                          |

<sup>a</sup>, Colony-direct PCR was conducted using the primer set and KAPA Taq DNA Polymerase (Kapa Biosystems, Woburn, MA). The PCR products from the donor hosts and the 10 colonies tested in each group were all the expected size based on gel electrophoresis.
