# Supplementary material
Source: PubMed Central journal article supplement (PMC4139722)
Supplement: ismej201429x4.pdf [file ismej201429x4.pdf]

a

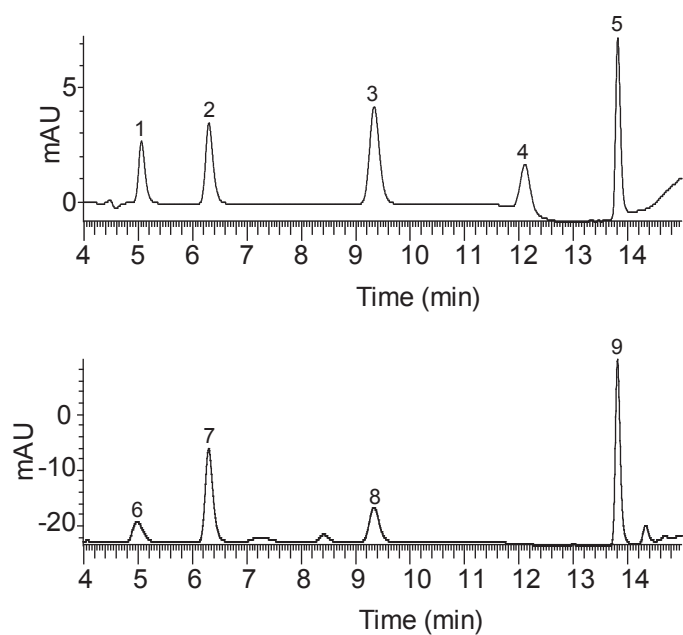

b

| Peak No. <sup>a</sup> | Nucleoside origin <sup>b</sup> | Identified nucleoside | Retention time (min) | Theoretical m/z | Measured m/z | $\Delta m/z$ |
|-----------------------|--------------------------------|-----------------------|----------------------|-----------------|--------------|--------------|
| 1                     |                                | Deoxycytidine         | 5.11                 | 228.101         | 228.09769    | 0.00331      |
| 2                     |                                | Deoxyuridine          | 6.40                 | 229.085         | 229.08180    | 0.00320      |
| 3                     |                                | Deoxyguanosine        | 9.39                 | 268.107         | 268.10371    | 0.00329      |
| 4                     |                                | Thymidine             | 12.14                | 243.107         | 243.09735    | 0.00965      |
| 5                     |                                | Deoxyadenosine        | 13.88                | 252.112         | 252.10884    | 0.00316      |
| 6                     | S6                             | Deoxycytidine         | 5.11                 | 228.101         | 228.09782    | 0.00318      |
| 7                     | S6                             | Deoxyuridine          | 6.40                 | 229.085         | 229.08191    | 0.00309      |
| 8                     | S6                             | Deoxyguanosine        | 9.39                 | 268.107         | 268.10391    | 0.00309      |
| 9                     | S6                             | Deoxyadenosine        | 13.88                | 252.112         | 252.10912    | 0.00288      |

<sup>a</sup>The peak numbers refer to those in Supplementary Figure S2a.

<sup>b</sup>The chemical formulae for deoxycytidine, deoxyuridine, deoxyguanosine, thymidine, and deoxyadenosine are  $C_9H_{14}N_3O_4$ ,  $C_9H_{13}N_2O_5$ ,  $C_{10}H_{14}N_5O_4$ ,  $C_{10}H_{14}N_2O_5$ , and  $C_{10}H_{14}N_5O_3$ , respectively.
