# Supplementary material
Source: PubMed Central journal article supplement (PMC4139722)

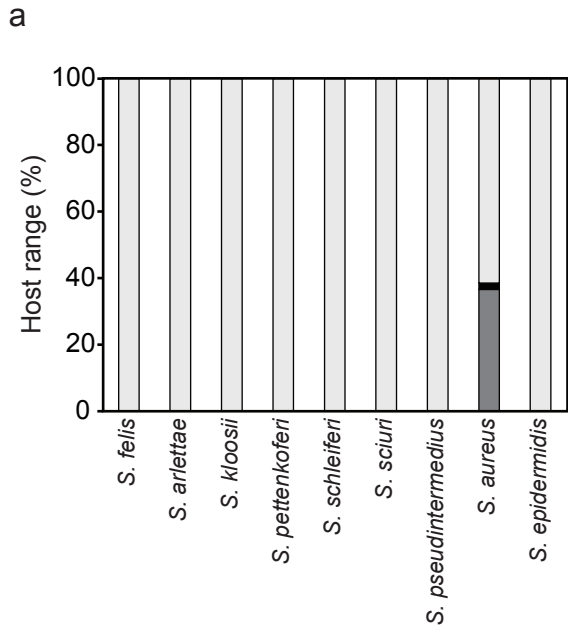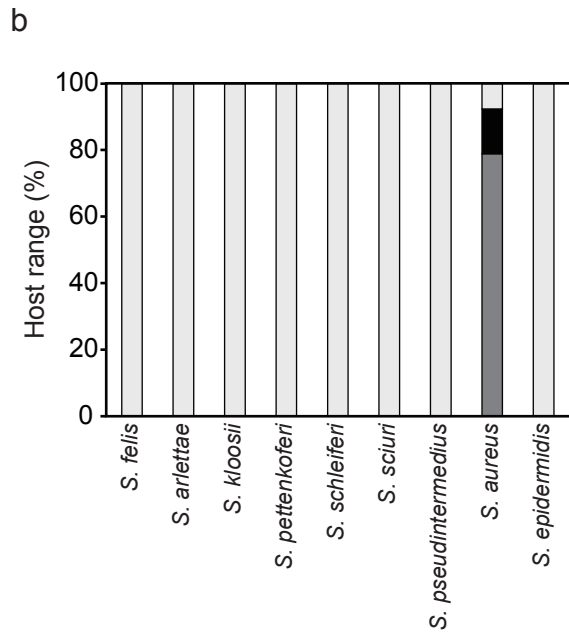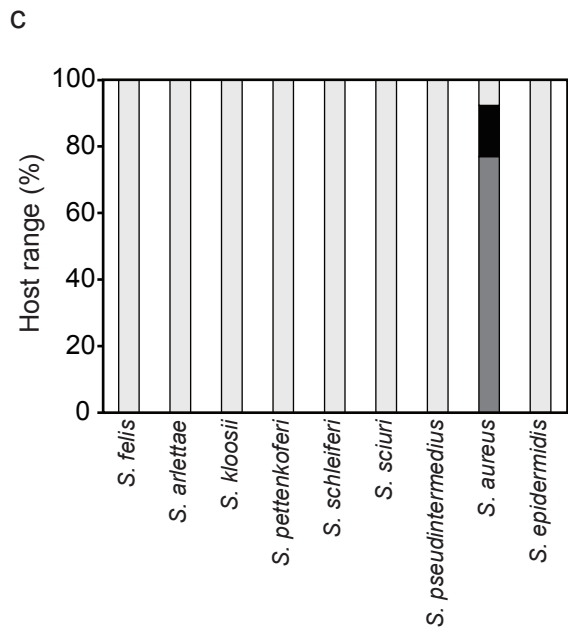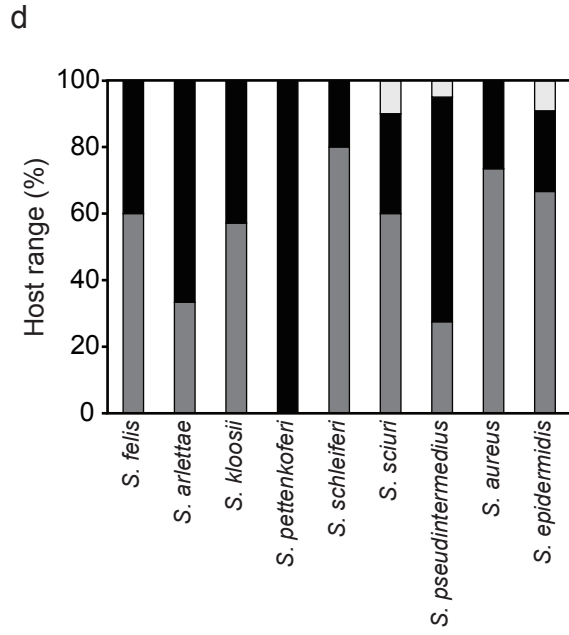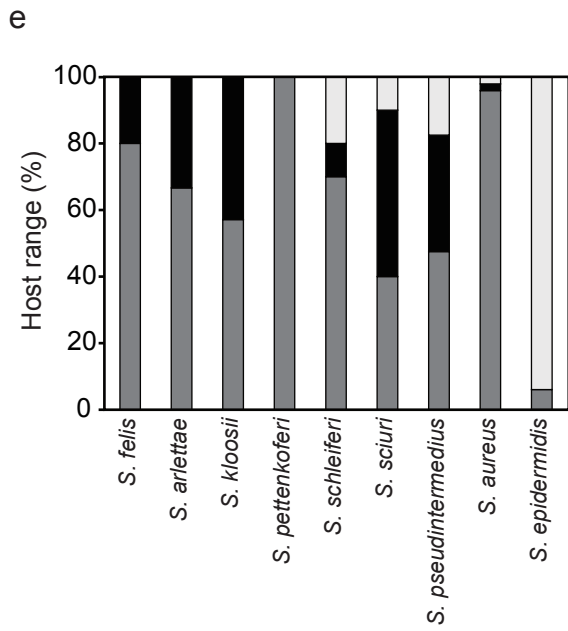

Supplement: ismej201429x5.pdf [file ismej201429x5.pdf]

a

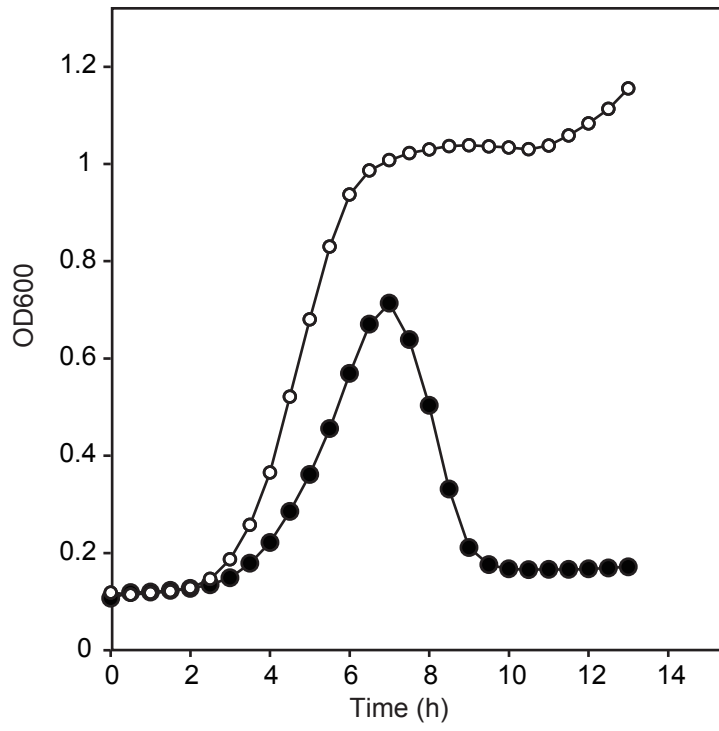

b

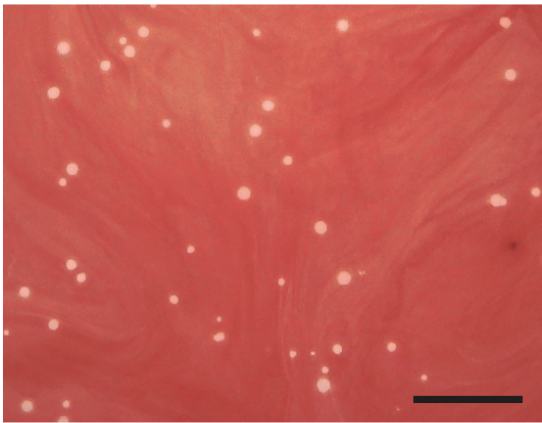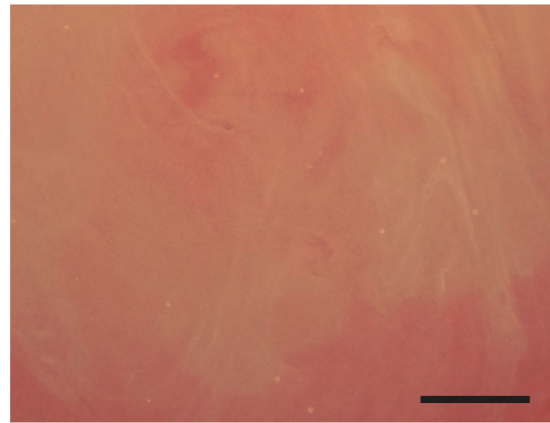

Supplementary Figure S3. Uchiyama *et al.*

Supplement: ismej201429x6.pdf [file ismej201429x6.pdf]

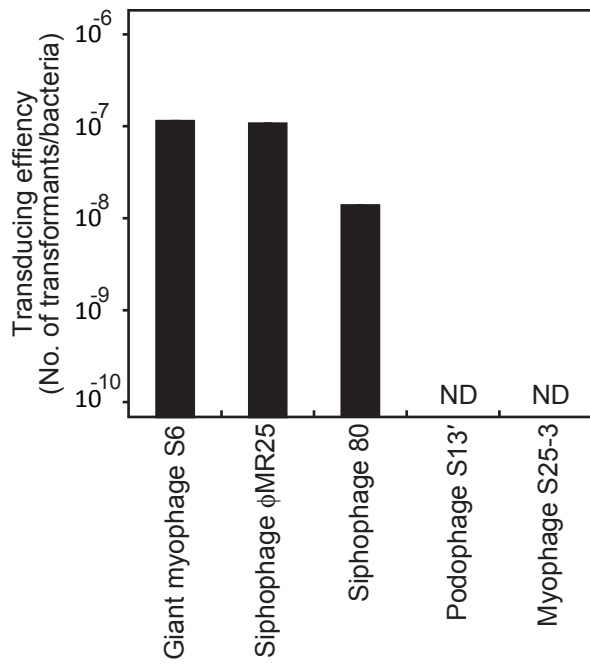

Supplementary Figure S4. Uchiyama *et al.*

Supplement: ismej201429x7.pdf [file ismej201429x7.pdf]
